# Supplementary material for: PET Imaging of the Neurotensin Targeting Peptide NOTA-NT-20.3 Using Cobalt-55, Copper-64 and Gallium-68
Source: Pharmaceutics. 2022 Dec 6;14(12):2724. doi: 10.3390/pharmaceutics14122724 (PMC9781609; doi:10.3390/pharmaceutics14122724)
Supplement: Supplementary file 1 [file pharmaceutics-14-02724-s001.zip › pharmaceutics-2020349-supplementary.pdf]

Supplement for PET Imaging of the Neurotensin Targeting Peptide NOTA-NT-20.3 Using Cobalt-55, Copper-64 and Gallium-68

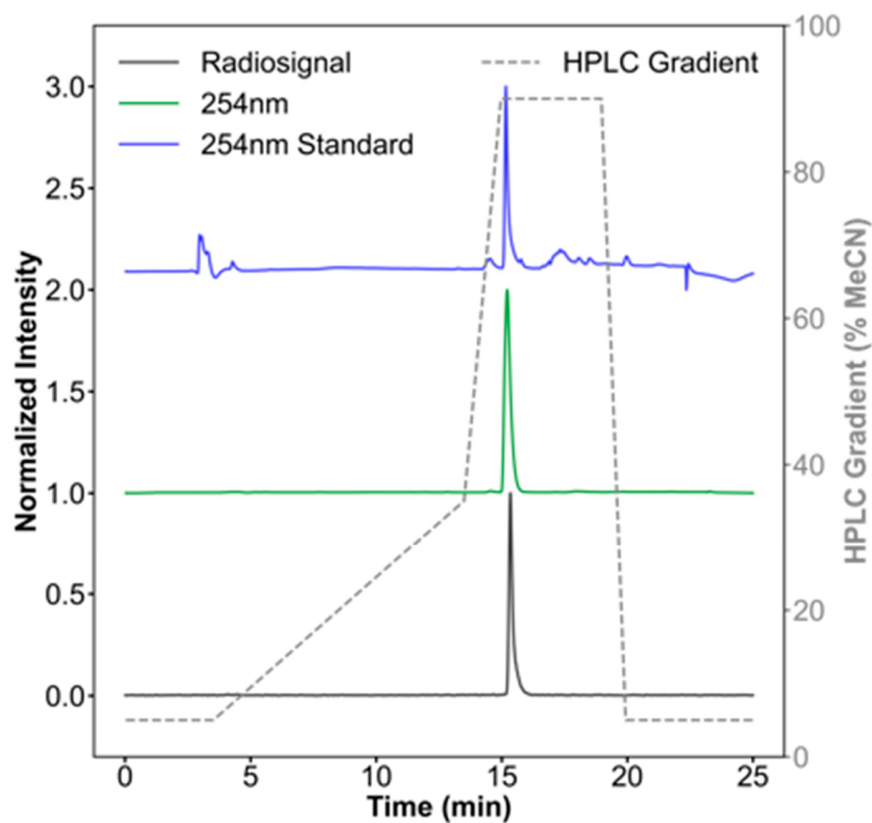

**Figure S1.** HPLC chromatograms of [ $^{55}\text{Co}$ ]Co-NOTA-NT-20.3 (Radiosignal and 254 nm) and a Co-NOTA-NT-20.3 standard (254 nm standard). A graphical representation of the HPLC solution gradient (mixture of 0.1% TFA  $\text{H}_2\text{O}$  and MeCN) is shown in dashed lines.

A high specific activity method was also developed. [ $^{55}\text{Co}$ ]Co-NOTA-NT-20.3 was radiolabeled at 7.4 MBq/nmol of ligand in pH 4.5 NaOAc buffer and heated at 95°C for 60 min with 2 mg/mL gentisic acid to inhibit radiolysis. Radiochemical purity was assessed by radio-HPLC using a reverse-phase 250 x 4.60 mm C18 5 $\mu\text{m}$  100Å column (DIONEX) and the gradient outlined in figure 1. The HPLC data in Figure 1 show [ $^{55}\text{Co}$ ]Co-NOTA-NT-20.3 radiolabeled using this method.

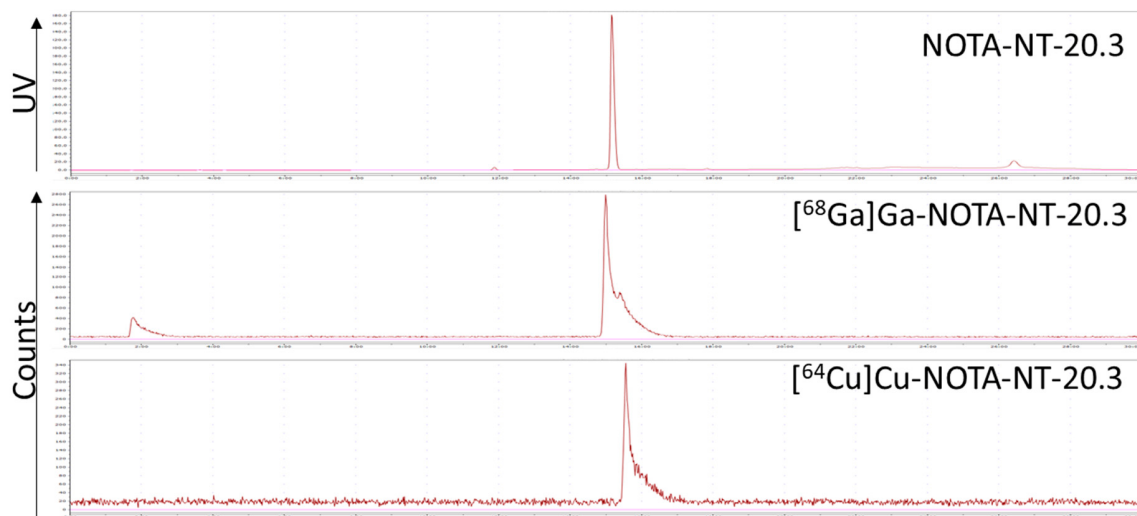

**Figure S2.** HPLC chromatograms of the  $[^{68}\text{Ga}]\text{Ga-NOTA-NT-20.3}$  and  $[^{64}\text{Cu}]\text{Cu-NOTA-NT-20.3}$ .

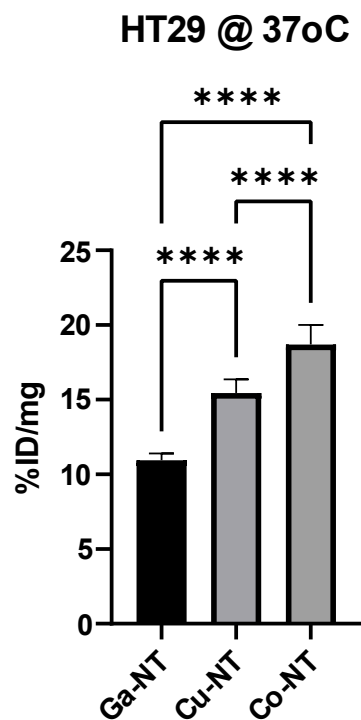

**Figure S3.** Statistical comparison of cell uptake of  $[^{68}\text{Ga}]\text{Ga-NOTA-NT-20.3}$ ,  $[^{64}\text{Cu}]\text{Cu-NOTA-NT-20.3}$ , and  $[^{55}\text{Co}]\text{Co-NOTA-NT-20.3}$  in HT29 cells. \*\*\*\*  $p < 0.0001$ .

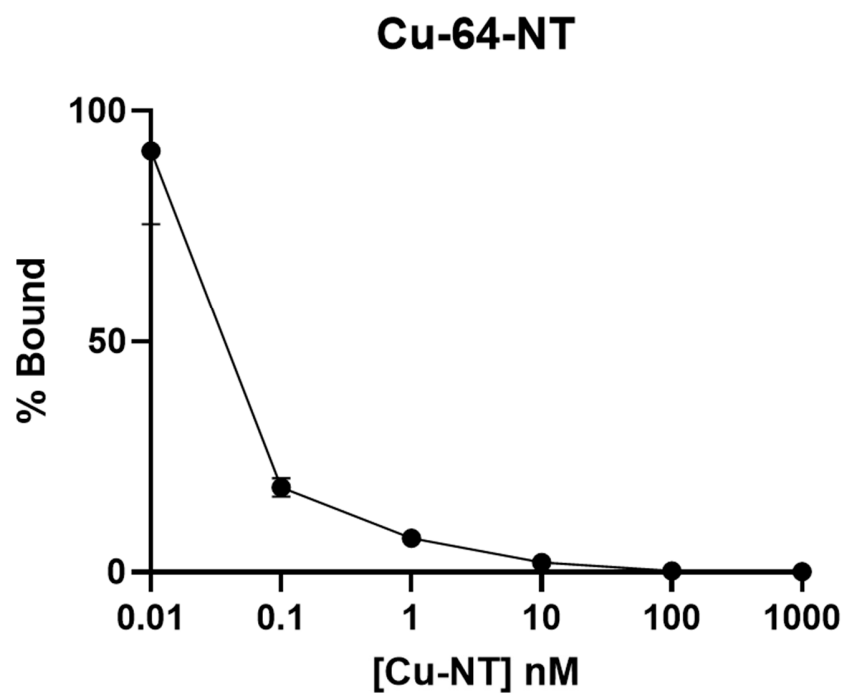

| nM        | 0.01 | 0.1 | 1    | 10    | 100    | 1000    |
|-----------|------|-----|------|-------|--------|---------|
| Cell CPM  | 45   | 50  | 150  | 550   | 750    | 2000    |
| Total CPM | 50   | 300 | 2500 | 25000 | 230000 | 1900000 |

**Figure S4.** Saturation binding of [<sup>64</sup>Cu]Cu-NOTA-NT-20.3 shows that the IC50 is below 10 nM.
